# Supplementary material for: An integrated organoid omics map extends modeling potential of kidney disease
Source: Research Square preprint supplement (doi:10.21203/rs.3.rs-2109564/v1), 2022-10-05
Supplement: Supplementary file 1 [file fcc07a515690253417bcd9e0.xlsx]

## Sheet: readme_table_info
supp_table_number

## Sheet: ST1_org_all_prot
gene_names

## Sheet: ST2_org_trajectory_FDR0p05_prot
gene_names

## Sheet: ST3_org_cell_rna
ensemblid

## Sheet: ST4_org_cell_types_scRNA_Seq
p_val

## Sheet: ST5_org_cell_tnfa_FDR_0p1_prot
gene_names

## Sheet: ST6_org_media_prots
gene_names

## Sheet: ST7_org_sup_tnfa_FDR_0p2_prot
gene_names

## Sheet: ST8_pod_cell_tnfa_FDR_0p1_prot
gene_names

## Sheet: ST9_pod_sup_tnfa_FDR_0p2_prot
gene_names

[truncated: 4 more sheets: ST10_320_prot_tnfa_sig, ST11_GePS_pathways, ST12_GePS_signal, ST13_receptors]
